# Supplementary material for: Development of a new colorimetric and red-emitting fluorescent dual probe for G-quadruplex nucleic acids
Source: Royal Society of Chemistry journal article supplement (doi:10.1039/c4cc01472c), 2014-01-01
Supplement: c4cc01472c1.pdf [file c4cc01472c1.pdf]

## Supplementary Information

# Development of a New Colorimetric and Red-Emitting Fluorescent Dual Probe for G-Quadruplex Nucleic Acids

Jin-Wu Yan,<sup>a,b</sup> Shuo-Bin Chen,<sup>a</sup> Hui-Yun Liu,<sup>a</sup> Wen-Jie Ye,<sup>a</sup> Tian-Miao Ou,<sup>a</sup> Jia-Heng Tan,<sup>a\*</sup> Ding Li,<sup>a</sup>  
Lian-Quan Gu,<sup>a</sup> Zhi-Shu Huang<sup>a\*</sup>

<sup>a</sup> School of Pharmaceutical Sciences, Sun Yat-sen University, Guangzhou 510006, China.

<sup>b</sup> School of Bioscience and Biotechnology, South China University of Technology, Guangzhou 510006, China.

### Table of Contents:

|                                                                                                            |     |
|------------------------------------------------------------------------------------------------------------|-----|
| <b>1. Experimental Section</b>                                                                             | S2  |
| <b>1.1 Synthesis and Characterization</b>                                                                  | S2  |
| <b>Scheme S1.</b> Synthesis of <b>ISCH-1</b>                                                               | S2  |
| <b>Figure S1.</b> <sup>1</sup> H NMR spectrum of <b>ISCH-1</b>                                             | S3  |
| <b>Figure S2.</b> <sup>13</sup> C NMR spectrum of <b>ISCH-1</b>                                            | S4  |
| <b>Figure S3.</b> NOESY spectrum of <b>ISCH-1</b>                                                          | S4  |
| <b>Figure S4.</b> HRMS spectrum of <b>ISCH-1</b>                                                           | S5  |
| <b>Figure S5.</b> HPLC analysis of <b>ISCH-1</b>                                                           | S5  |
| <b>1.2 Materials</b>                                                                                       | S6  |
| <b>Table S1.</b> Sequences of oligonucleotides used in the present study                                   | S6  |
| <b>1.3 UV-Vis Spectroscopic Studies</b>                                                                    | S7  |
| <b>1.4 Fluorescence Studies</b>                                                                            | S7  |
| <b>1.5 Dual-Channel and Large-Scale Identification of G-Quadruplexes</b>                                   | S7  |
| <b>1.6 SPR Studies</b>                                                                                     | S7  |
| <b>1.7 Live Cell Staining Experiment</b>                                                                   | S8  |
| <b>1.8 DNase and RNase Digest Experiment</b>                                                               | S8  |
| <b>1.9 ChIP Assay</b>                                                                                      | S8  |
| <b>2. Other Supplementary Spectra and Graphs</b>                                                           | S10 |
| <b>Figure S6.</b> CD spectra of G-quadruplex forming oligonucleotides without and with <b>ISCH-1</b>       | S10 |
| <b>Figure S7.</b> Fluorescence spectra of <b>ISCH-1</b> in glycerol–H <sub>2</sub> O mixtures              | S10 |
| <b>Figure S8.</b> SPR sensorgrams for binding of <b>ISCH-1</b> to the immobilized DNA                      | S11 |
| <b>Figure S9.</b> Fluorescence spectra of <b>ISCH-1</b> without and with different G-rich oligonucleotides | S11 |
| <b>Figure S10.</b> Photograph of <b>ISCH-1</b> without and with DNA                                        | S12 |
| <b>Figure S11.</b> Confocal fluorescence images of live cells stained by <b>ISCH-1</b>                     | S12 |
| <b>Figure S12.</b> Real-time cell analysis of A549 cells treated with <b>ISCH-1</b>                        | S13 |

# 1. Experimental Section

## 1.1 Synthesis and Characterization

Scheme S1. Synthesis of ISCH-1<sup>a</sup>

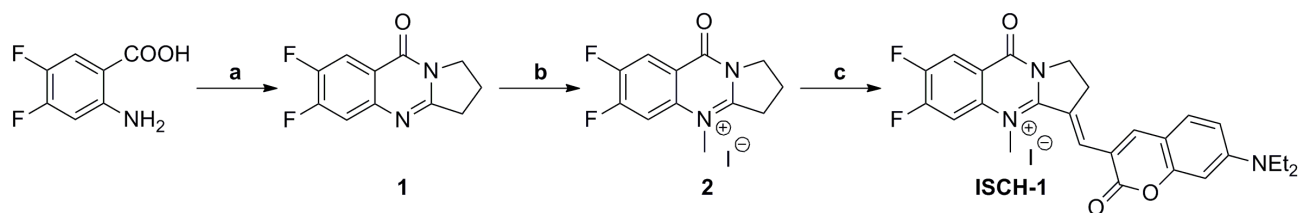

<sup>a</sup> Reagents and conditions: (a) pyrrolidin-2-one, POCl<sub>3</sub>, reflux; (b) CH<sub>3</sub>I, tetramethylene sulfone, 50 °C; (c) 7-diethylaminocoumarin-3-aldehyde, AcOH, AcONa, reflux.

<sup>1</sup>H, <sup>13</sup>C and <sup>19</sup>F NMR spectra were recorded using TMS or CFCl<sub>3</sub> as the internal standard in DMSO-*d*<sub>6</sub> or CDCl<sub>3</sub> with a Bruker BioSpin GmbH spectrometer at 400 MHz, 100 MHz and 376 MHz, respectively. Mass spectra (MS) were recorded on a Shimadzu LCMS-2010A instrument with an ESI or ACPI mass selective detector and high resolution mass spectra (HRMS) on Shimadzu LCMSIT-TOF. Melting points (mp) were determined using a SRS OptiMelt automated melting point instrument without correction. Flash column chromatography was performed with silica gel (200–300 mesh) purchased from Qingdao Haiyang Chemical Co. Ltd. The purity of synthesized compound was confirmed to be higher than 95% by using analytical HPLC performed with a dual pump Shimadzu LC-20 AB system equipped with a Ultimate XB-C18 column (4.6 × 250 mm, 5 μm) and eluted with methanol-water (55 : 45) containing 0.1% TFA at a flow rate of 1.0 mL·min<sup>-1</sup>. All chemicals were purchased from commercial sources unless otherwise specified. All the solvents were of analytical reagent grade and were used without further purification. Compound 7-*N,N*-diethylaminocoumarin-3-aldehyde was synthesized according to previous report.<sup>1</sup>

**Synthesis of 6,7-difluoro-2,3-dihydropyrrolo[2,1-*b*]quinazolin-9(1H)-one (1).**<sup>2</sup> To a solution of 2-amino-4,5-difluorobenzoic acid (3.34 g, 19.3 mmol) and pyrrolidin-2-one (3.00 mL, 39.5 mmol) was carefully added 45 mL of POCl<sub>3</sub> at room temperature. The mixture was then stirred at 110 °C for 7 h. After POCl<sub>3</sub> was removed under reduced pressure, the residue was poured into ice water, and then solution of NaOH was added to make the solution basic. The mixture was extracted with 3 × 50 mL portions of CH<sub>2</sub>Cl<sub>2</sub>. The combine organic phase was dried over MgSO<sub>4</sub> and concentrated under reduced pressure. The crude product was purified by using flash column chromatography with EtOAc/petroleum ether (1 : 4) elution to afford a white solid (**1**, 2.81 g, yield 65%): <sup>1</sup>H NMR (400 MHz, CDCl<sub>3</sub>) δ 8.02 (t, J = 9.2 Hz, 1H), 7.49-7.34 (m, 1H), 4.20 (t, J = 7.1 Hz, 2H), 3.17 (t, J = 7.8 Hz, 2H), 2.37-2.23 (m, 2H). ESI-MS *m/z*: 223.1 [M+H]<sup>+</sup>.

**Synthesis of 6,7-difluoro-4-methyl-9-oxo-1,2,3,9-tetrahydropyrrolo[2,1-*b*]quinazolin-4-ium iodide (2).**<sup>3</sup> A solution of **1** (0.71 g, 3.22 mmol) in tetramethylene sulfone (1.0 mL) was treated with CH<sub>3</sub>I (2.0 mL, 32 mmol). The mixture was heated at 50 °C for 12 h. After cooling, the mixture was filtered, washed with anhydrous ether and dried under vacuum to afford the product as a white solid (**2**, 0.99 g, yield 85%): <sup>1</sup>H NMR (400 MHz, DMSO-*d*<sub>6</sub>) δ 8.54-8.32 (m, 2H), 4.32 (t, J = 8.0 Hz, 2H), 3.99 (s, 3H), 3.73 (t, J = 7.9 Hz, 2H), 2.42-

2.30 (m, 2H). ESI-MS m/z: 237.1 [M-I]<sup>+</sup>.

**Synthesis of (*E*)-3-((7-(diethylamino)-2-oxo-2H-chromen-3-yl)methylene)-6,7-difluoro-4-methyl-9-oxo-1,2,3,9-tetrahydropyrrolo[2,1-b]quinazolin-4-ium iodide (ISCH-1).** A mixture of **2** (0.15 g, 0.43 mmol), 7-*N,N*-diethylaminocoumarin-3-aldehyde (0.11 g, 0.45 mmol), AcOH (5 mL), and AcONa (0.02 g) was stirred at reflux temperature for 12 h. After cooling to room temperature, the mixture was poured into water and extracted with CH<sub>2</sub>Cl<sub>2</sub>. The organic phase was dried over MgSO<sub>4</sub> and concentrated under reduced pressure. The crude product was purified by using flash column chromatography with CH<sub>3</sub>OH/CH<sub>2</sub>Cl<sub>2</sub> (1 : 20) elution to afford brownish black solid **ISCH-1** (0.09 g, yield 36%): mp > 300 °C. <sup>1</sup>H NMR (400 MHz, DMSO-*d*<sub>6</sub>) δ 8.44-8.29 (m, 3H), 7.88 (s, 1H), 7.70 (d, *J* = 9.0 Hz, 1H), 6.87 (d, *J* = 7.8 Hz, 1H), 6.65 (s, 1H), 4.33-4.20 (m, 5H), 3.53 (q, *J* = 7.1 Hz, 4H), 3.37 (t, *J* = 6.0 Hz, 2H), 1.17 (t, *J* = 6.8 Hz, 6H). <sup>13</sup>C NMR (100 MHz, DMSO-*d*<sub>6</sub>) δ 160.34, 159.79, 156.96, 156.12, 152.74, 145.41, 139.64, 138.88, 131.83, 126.28, 116.61, 115.60, 115.40, 112.81, 110.41, 109.75, 109.52, 108.48, 96.47, 46.75, 44.49, 41.27, 27.61, 12.38. <sup>19</sup>F NMR (376 MHz, DMSO-*d*<sub>6</sub>) δ -122.58, -134.06. ESI-MS m/z: 464.2 [M-I]<sup>+</sup>. Purity: 97.7% by HPLC. HRMS (ESI): calcd for [M-I]<sup>+</sup> (C<sub>26</sub>H<sub>24</sub>F<sub>2</sub>N<sub>3</sub>O<sub>3</sub>) 464.1780, found 464.1786.

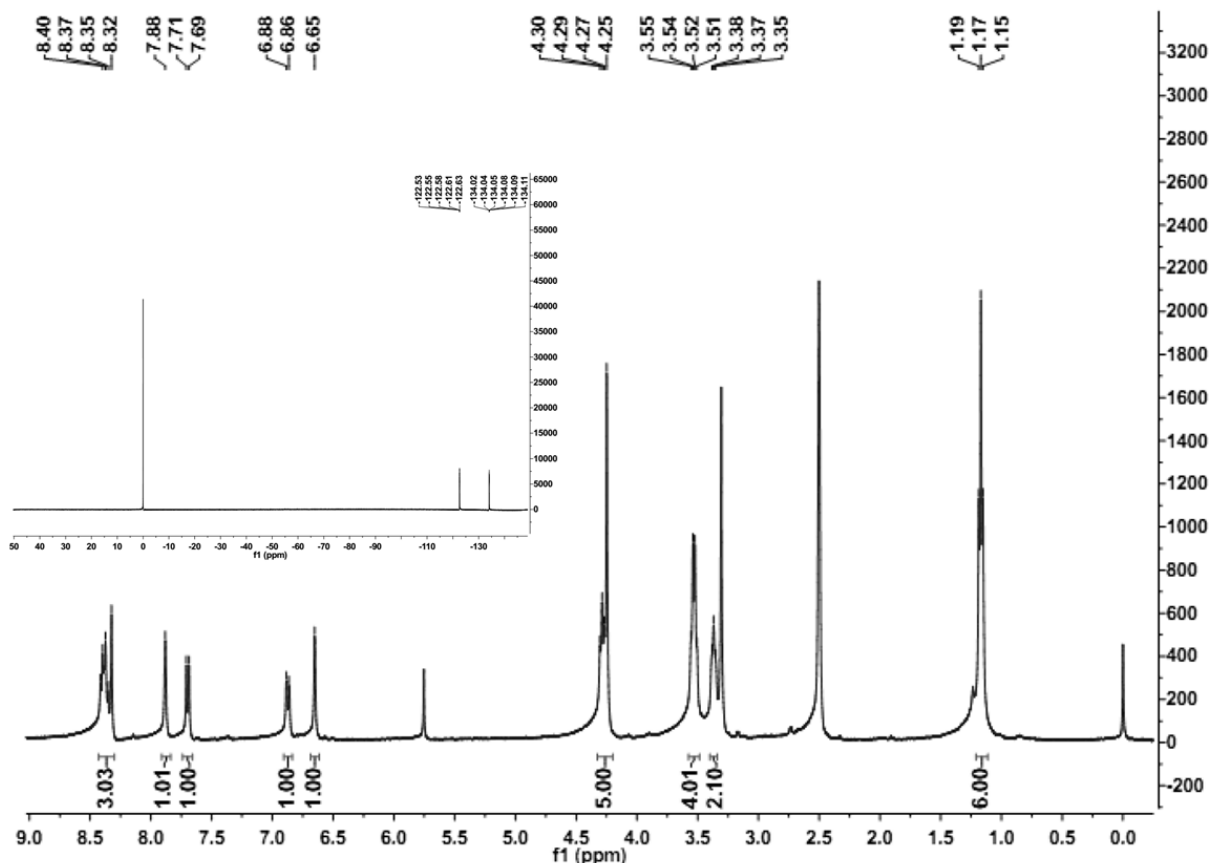

**Figure S1.** <sup>1</sup>H NMR and <sup>19</sup>F NMR (inner panel) spectra of ISCH-1.

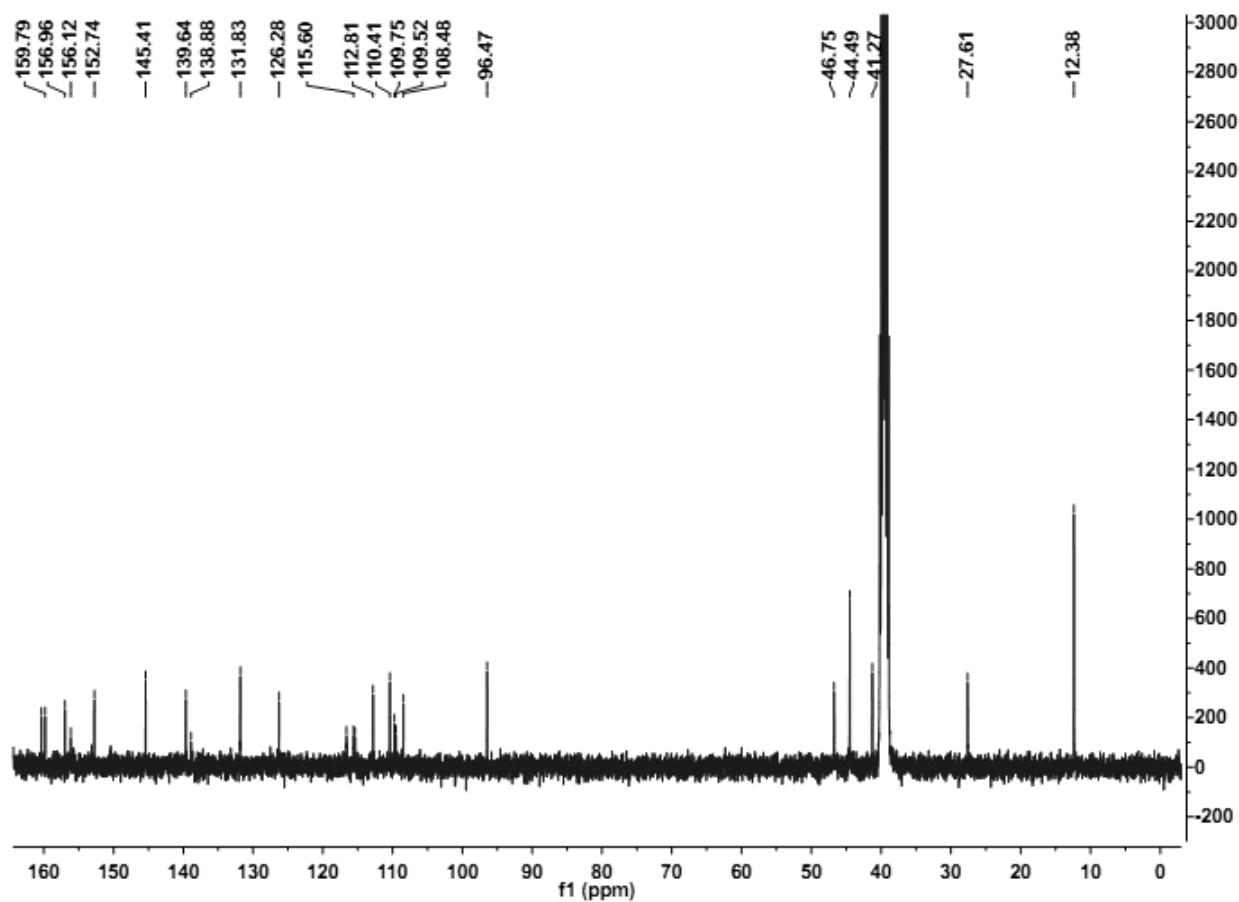

Figure S2.  $^{13}\text{C}$  NMR spectrum of ISCH-1.

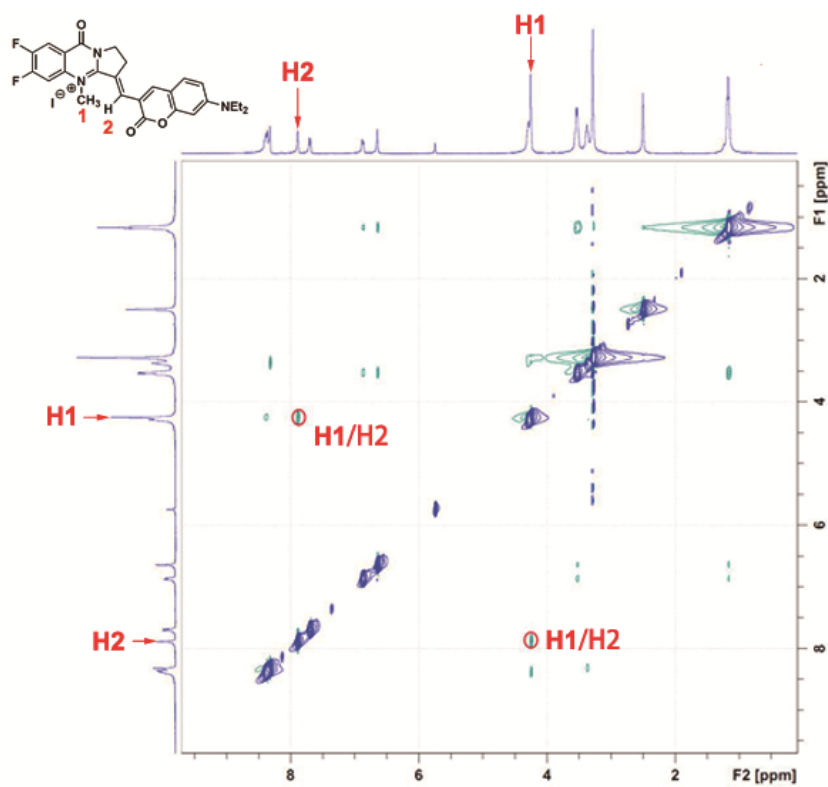

Figure S3. NOESY spectrum of ISCH-1.

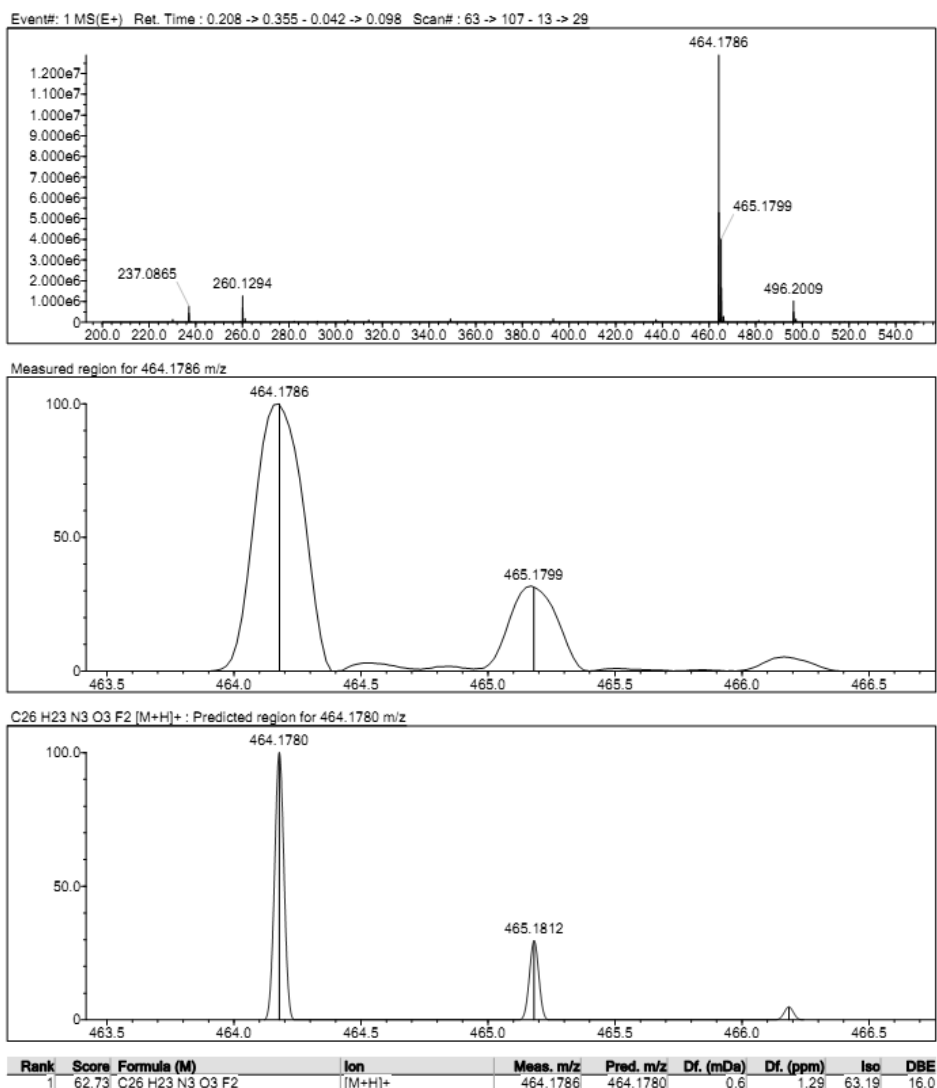

Figure S4. HRMS spectrum of ISCH-1.

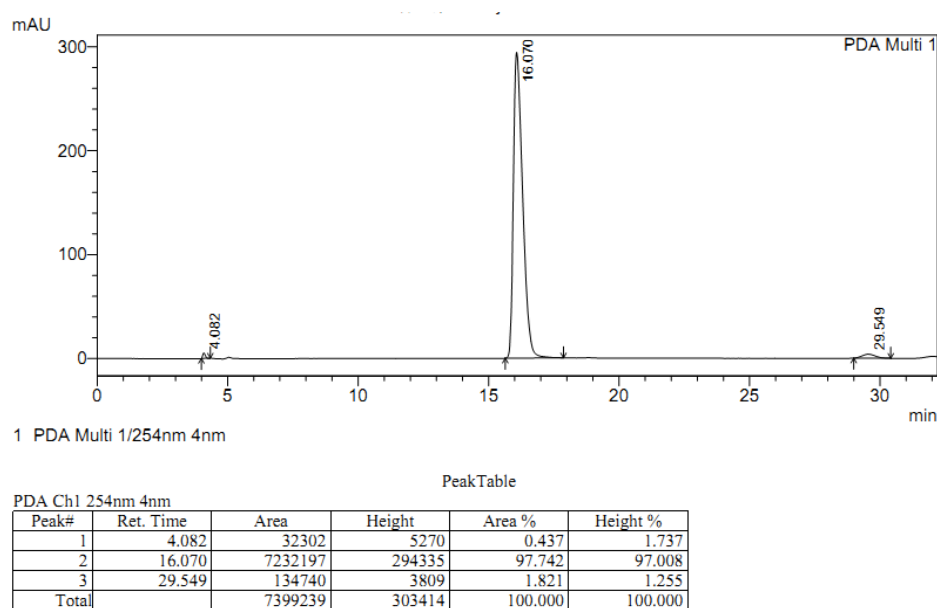

Figure S5. HPLC analysis of ISCH-1.

## 1.2 Materials

All oligonucleotides used in this study were purchased from Invitrogen (Shanghai, China) and Sangon (Shanghai, China). Calf thymus DNA (CT-DNA), bovine serum albumin (BSA) and DAPI were purchased from Sigma-Aldrich (Singapore). RNase-free DNase I, DNase and protease-free RNase A and Pierce Agarose ChIP Kit were purchased from Thermo Scientific (USA). Antibody against nucleolin was purchased from Abcam (USA). Normal rabbit IgG was purchased from Santa Cruz Biotechnology (USA). Tumor cell lines were obtained from the American Type Culture Collection. All the oligonucleotides, CT-DNA and BSA were dissolved in relevant buffer. Their concentrations were determined from the absorbance at 260 nm and 279 nm for DNA and BSA, respectively on the basis of respective molar extinction coefficients using NanoDrop 1000 Spectrophotometer (Thermo Scientific). To obtain G-quadruplex formation, highly concentrated solutions of oligonucleotides were annealed in relevant buffer containing KCl by heating to 90 °C for 5 min, followed by gradual cooling to room temperature and incubation at 4 °C overnight. The oligonucleotides were engaged in G-quadruplex formation, as determined by circular dichroism (CD) measurements (Fig. S6). Stock solutions of **ISCH-1** (10 mM) were dissolved in DMSO and stored at -80 °C. Further dilutions of samples and **ISCH-1** to working concentrations were made with relevant buffer immediately prior to use.

**Table S1.** Sequences of oligonucleotides used in the present study

| Name         | Oligonucleotide Sequence                                |
|--------------|---------------------------------------------------------|
| dA21         | 5'-d[AAAAAAAAAAAAAAAAAAAAA]-3'                          |
| dT21         | 5'-d[TTTTTTTTTTTTTTTTTTTT]-3'                           |
| ds15         | 5'-d[CGCGCGTTTCGCGCG]-3'                                |
| htg21        | 5'-d[GGGTAGGGTTAGGGTTAGGG]-3'                           |
| htc21        | 5'-d[CCCTAACCTAACCTAACCC]-3'                            |
| c-kit1       | 5'-d[AGGGAGGGCGCTGGGAGGAGGG]-3'                         |
| c-kit2       | 5'-d[GGGCGGGCGCGAGGGAGGGG]-3'                           |
| pu18         | 5'-d[AGGGTGGGGAGGGTGGGG]-3'                             |
| pu27         | 5'-d[TGGGGAGGGTGGGGAGGGTGGGGAAGG]-3'                    |
| Rb           | 5'-d[CGGGGGTTTTGGGCGGC]-3'                              |
| ILPR         | 5'-d[ACAGGGTGTGGGGACAGGGTGTGGGG]-3'                     |
| KRAS         | 5'-d[AGGGCGGTGTGGGAAGAGGGAAGAGGGGAGG]-3'                |
| VEGF         | 5'-d[GGGCGGGCCGGGGCGGGG]-3'                             |
| RET          | 5'-d[GGGCGGGGCGGGGCGGGG]-3'                             |
| bcl-2        | 5'-d[GGGCGGGGAGGAAGGGGGCGGG]-3'                         |
| THTG         | 5'-d[TTGGGGTTGGGGTTGGGGTTGGGG]-3'                       |
| dimer        | 5'-d[GGGGTTTTGGGG]-3'                                   |
| tetramer     | 5'-d[TGGGGT]-3'                                         |
| HT-6         | 5'-d[TTAGGG]-3'                                         |
| hras-1       | 5'-d[TCGGTTCGGGCGCAGGGCACGGGCG]-3'                      |
| STAT3        | 5'-d[GGGCTGGGGATGGGGAGGGG]-3'                           |
| mutated-pu22 | 5'-d[TGAGCGTGGCGAGCGTGGCGAA]-3'                         |
| rDNA-2957    | 5'-d[GGGTCGGGGGGTGGGGCCCGGGCCGGGG]-3'                   |
| rDNA-5701    | 5'-d[AGGGAGGGAGACGGGGGGG]-3'                            |
| rDNA-13079   | 5'-d[GGGGTGGGGGGGAGGG]-3'                               |
| SPR- HTG     | 5'-biotin-d[GTTAGGGTTAGGGTTAGGGTTAGGGTTAGG]-3'          |
| SPR-c-MYC    | 5'-biotin-d[ACGTACGTGGGGAGGGTGGGGAGGGTGGGGAAGGTGGGG]-3' |
| SPR-c-KIT    | 5'-biotin-d[AGGGAGGGCGCTGGGAGGAGGG]-3'                  |
| SPR-Single   | 5'-biotin-d[AGTTAGAGTTAGAGTTAGAGTTAGAGTTAG]-3'          |
| SPR-Duplex   | 5'-biotin-d[TTCGCGCGCGTTTTTCGCGCGCG]-3'                 |

### 1.3 UV-Vis Spectroscopic Studies

UV-Vis spectroscopic studies were performed on a UV-2450 spectrophotometer (Shimadzu, Japan) using 1 cm path length quartz cuvette. For titration experiment, all oligonucleotides were firstly prepared through heating at 95 °C for 10 min followed with slow cooling to room temperature. Small aliquots of a stock solution of sample (oligonucleotides, CT-DNA and BSA) were added into the solution containing **ISCH-1** at fixed concentration (5 μM) in Tris-HCl buffer (10 mM, pH 7.4) with 60 mM KCl. The final concentration of sample was varied from 0 to 15 μM. After each addition of sample, the reaction was stirred and allowed to equilibrate for at least 2 min and absorbance measurement was taken.

### 1.4 Fluorescence Studies<sup>4-5</sup>

Fluorescence studies were performed on a LS-55 luminescence spectrophotometer (Perkin-Elmer, USA). A quartz cuvette with 1 cm × 1 cm path length was used for the spectra recorded at 10 nm excitation and emission slit widths unless otherwise specified. The fluorescence quantum yield ( $\Phi_F$ ) of **ISCH-1** was calculated relative to a standard solution of sulforhodamine 101 in ethanol ( $\Phi_F = 0.95$ ) and was determined using the following formula:  $\Phi_u = \Phi_s(I_u A_s / I_s A_u) \times (n_u / n_s)^2$ , where  $\Phi$  is the fluorescence quantum yield,  $I$  is the measured integrated emission intensity,  $n$  is the refraction index of the solvents, and  $A$  is the optical density (absorbance). The  $u$  refers to the compound (**ISCH-1**) of unknown quantum yield, and  $s$  refers to the reference compound (sulforhodamine 101) of known quantum yield. The fluorescence spectra were recorded at 5 nm excitation and emission slit widths for the determination of  $\Phi$ .

For titration experiment, all oligonucleotides were firstly prepared through heating at 95 °C for 10 min followed with slow cooling to room temperature. Small aliquots of a stock solution of sample (oligonucleotides, CT-DNA and BSA) were added into the solution containing **ISCH-1** at fixed concentration (5 μM) in Tris-HCl buffer (10 mM, pH 7.4) with 60 mM KCl. The final concentration of sample was varied from 0 to 15 μM. After each addition of sample, the reaction was stirred and allowed to equilibrate for at least 2 min and fluorescence measurement was taken at Ex 570 nm.

### 1.5 Dual-Channel and Large-Scale Identification of G-Quadruplexes

Probe **ISCH-1** (5 μM) without and with sample (oligonucleotides, CT-DNA and BSA, 5 μM) were dissolved in 150 μL Tris-HCl buffer (10 mM, pH 7.4) containing 60 mM KCl. These mixtures were then added into 96-well plate. After incubation for 4 min at 25 °C, their absorbance at 535 and 600 nm as well as fluorescent intensity at 653 nm ( $\lambda_{ex} = 570$  nm) were determined using a FlexStation 3 benchtop multi-mode microplate reader (Molecular Devices, USA). Each sample was examined in triplicate.

### 1.6 SPR Studies

SPR measurements were performed on a ProteOn XPR36 Protein Interaction Array system (Bio-Rad Laboratories, Hercules, CA) using a Streptavidin-coated GLH sensor chip. Biotinylated oligonucleotides (SPR- HTG, SPR-c-MYC, SPR-c-KIT, SPR-Single, SPR-Duplex) were attached to the chip. In a typical experiment, biotinylated DNA was folded in filtered and degassed running buffer (50 mM Tris-HCl, 100 mM

KCl, pH 7.4). The DNA samples were then captured (~1000 RU) in five flow cell, leaving one flow cell as a blank. Ligand solutions were prepared with running buffer through serial dilutions of stock solution. Five concentrations were injected simultaneously at a flow rate of 50  $\mu\text{L}\cdot\text{min}^{-1}$  for 400 s of association phase, followed with 400 s of dissociation phase at 25 °C. The GLH sensor chip was regenerated with short injection of 50 mM NaOH between consecutive measurements. The final graphs were obtained by subtracting blank sensorgrams from different DNA sensorgrams. Data were analyzed with ProteOn manager software, using the Langmuir model for fitting kinetic data.

### 1.7 Live Cell Staining Experiment

The cells were grown in DMEM media containing 10% fetal bovine serum, 100  $\text{U}\cdot\text{mL}^{-1}$  penicillin with 100  $\mu\text{g}\cdot\text{mL}^{-1}$  streptomycin at 37 °C, with 5%  $\text{CO}_2$  atmosphere.  $2.0 \times 10^5$  Cells were seeded in 3 cm Petri dishes and grew overnight. Cells were incubated with 8  $\mu\text{M}$  (5  $\mu\text{g}\cdot\text{mL}^{-1}$ ) of Hoechst 33342 in DMEM media containing 10% fetal bovine serum for 5 min, and subsequently stained with 5  $\mu\text{M}$  **ISCH-1** for 20 min at 37 °C, with 5%  $\text{CO}_2$  atmosphere. The cells were imaged using a LSM 710 laser scanning confocal microscope (Carl Zeiss, Germany) with a 60 $\times$  objective lens at 37 °C, with 5%  $\text{CO}_2$  atmosphere. The excitation wavelengths were 405 nm for Hoechst 33342 and 543 nm for **ISCH-1**, respectively. Duplicated experiments were performed.

### 1.8 DNase and RNase Digest Experiment<sup>6</sup>

The HeLa cells were grown in DMEM media containing 10% fetal bovine serum, 100  $\text{U}\cdot\text{mL}^{-1}$  penicillin with 100  $\mu\text{g}\cdot\text{mL}^{-1}$  streptomycin at 37 °C, with 5%  $\text{CO}_2$  atmosphere.  $2.0 \times 10^5$  Cells were seeded in 3 cm Petri dishes and grew overnight. Cells were fixed with 4% paraformaldehyde in PBS for 15 min (rinsed with 0.1 M PBS twice). The cell membrane was then permeabilized by immersing the cell in 0.3% Triton X-100 for 30 min (rinsed with 0.1 M PBS twice). Cells were incubated with 100  $\text{units}\cdot\text{mL}^{-1}$  RNase-free DNase I, or 100  $\text{units}\cdot\text{mL}^{-1}$  DNase and Protease-free RNase A, or PBS as control, at 37 °C in 5%  $\text{CO}_2$  for 2 h. Cells were stained with 5  $\mu\text{M}$  of **ISCH-1** in PBS for 30 min at 37 °C (rinsed with 0.1 M PBS twice), and subsequently stained with 14  $\mu\text{M}$  (5  $\mu\text{g}\cdot\text{mL}^{-1}$ ) DAPI for 20 min at 37 °C (rinsed with 0.1 M PBS for three times). The cells were imaged using a LSM 710 laser scanning confocal microscope with a 60 $\times$  objective lens. The excitation wavelengths were 405 nm for DAPI and 543 nm for **ISCH-1**, respectively. Duplicated experiments were performed.

### 1.9 ChIP Assay<sup>7</sup>

The A549 cells were grown in DMEM media containing 10% fetal bovine serum at 37 °C, with 5%  $\text{CO}_2$  atmosphere. ChIP assay was performed using the Pierce Agarose ChIP Kit following the protocol described in the kit. Briefly, A549 cells were treated with 0.1% DMSO or 5  $\mu\text{M}$  **ISCH-1** for 16 h, and then fixed with 1% formaldehyde for 10 min and lysed. Chromatin was sheared to an average size of 200-500 bp using nuclease (provided by the kit). 10% of lysate was used as input control. 3  $\mu\text{g}$  antibody against nucleolin was used to immunoprecipitate chromatin. Normal rabbit IgG was used as negative control. ChIP was performed overnight at 4 °C. Immunoprecipitated DNA samples were amplified by using PCR. The sequences of primers used in the



PCR are as follows: +2121, 5'-d[**TGCCTGAGGTTTCTCCCCGA**]-3' and 5'-d[**CAACGGACGTGAAGCCGGTG**]-3'; +2907, 5'-d[**GACGTGTGGCGTGGGTCGAC**]-3' and 5'-d[**GACGGGAGGCAGCGACCGG**]-3'; +4995, 5'-d[**TTCTTAGTTGGTGGAGCGATTTG**]-3' and 5'-d[**ATCTAAGGGCATCACAGACCTGT**]-3'; +5645, 5'-d[**GTTCGCTCGCTCGTTCGTTTC**]-3' and 5'-d[**CAACGACACGCCCTTCTTTC**]-3'; +12323, 5'-d[**TTCATAGCGACGTCGCTTTTTG**]-3' and 5'-d[**ACCAAATGTCTGAACCTGCGGT**]-3'; and +12855, 5'-d[**ACCTGGCGCTAAACCATTCGT**]-3' and 5'-d[**GGACAAACCCTTGTGTCGAGG**]-3'. The primers were used to amplify three regions containing PQSs in the non-template strand of rDNA (rDNA-2957, rDNA-5701, and rDNA-13079) and three corresponding regions that are flanking the three PQSs (rDNA-2121, rDNA-4995, and rDNA-12323) but they are themselves are not PQSs. The amplified products were separated on a 2.5% agarose gel, and photos were taken on a Gel Doc 2000 Imager System (Bio-Rad Laboratories, Hercules, CA). Duplicated experiments were carried out.

## Other Supplementary Spectra and Graphs

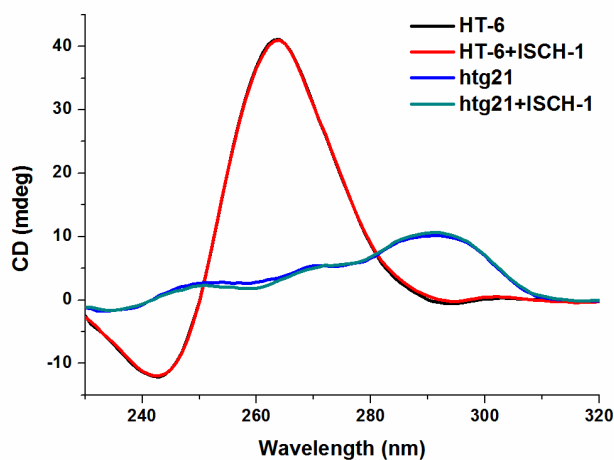

**Figure S6.** CD spectra of 5  $\mu\text{M}$  G-quadruplex forming oligonucleotides HT-6 and htg21 in 10 mM Tris-HCl buffer, 60 mM KCl, pH 7.4, without and with 5  $\mu\text{M}$  ISCH-1. The HT-6 oligonucleotide formed parallel-type G-quadruplex structure and the htg21 oligonucleotide formed hybrid-type G-quadruplex structure. The quadruplex topology of these oligonucleotides was retained with the binding of ISCH-1. CD experiments were performed in a Chirascan circular dichroism spectrophotometer (Applied Photophysics, UK). A quartz cuvette with a 4 mm path length was used for the recording of spectra over a wavelength range of 230–320 nm with a 1 nm bandwidth, 1 nm step size and time of 0.5 s per point.

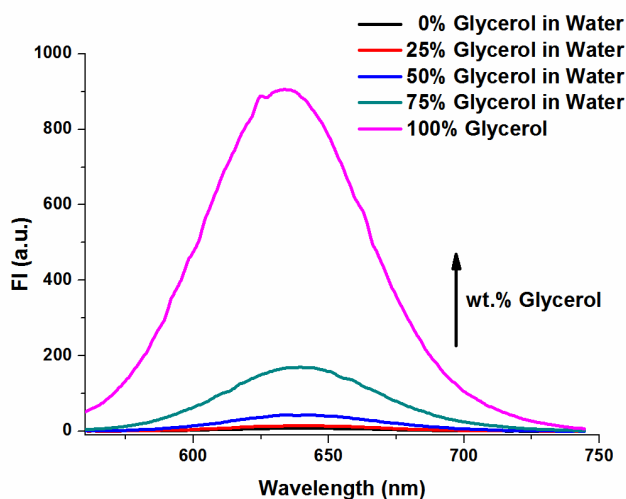

**Figure S7.** Fluorescence spectra of ISCH-1 (20  $\mu\text{M}$ ) in glycerol–H<sub>2</sub>O mixtures (wt.% glycerol: 0, 25, 50, 75, 100%). All samples were excited at 536 nm. The arrow indicated changes in fluorescence intensity upon increasing the glycerol content from 0 to 100%. A quartz cuvette with 0.2 cm  $\times$  1 cm path length was used.

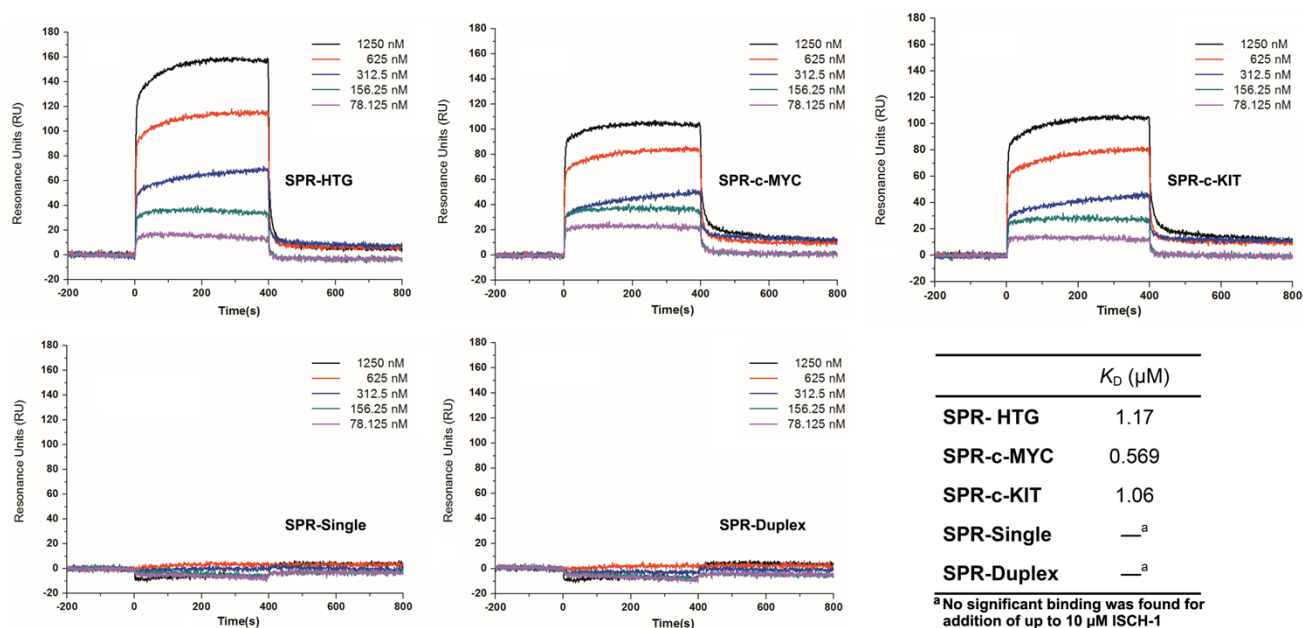

**Figure S8.** SPR sensorgrams for binding of **ISCH-1** to the immobilized G-quadruplex DNA (SPR-HTG, SPR-c-MYC, SPR-c-KIT), single-strand DNA (SPR-Single), and double-strand DNA (SPR-Duplex). In the plot, the concentrations of **ISCH-1** in the flow solutions were 78.125, 156.25, 312.5, 625, and 1250 nM. Equilibrium binding constants ( $K_D$ ) for the binding of **ISCH-1** with different DNA were given in the inset table.

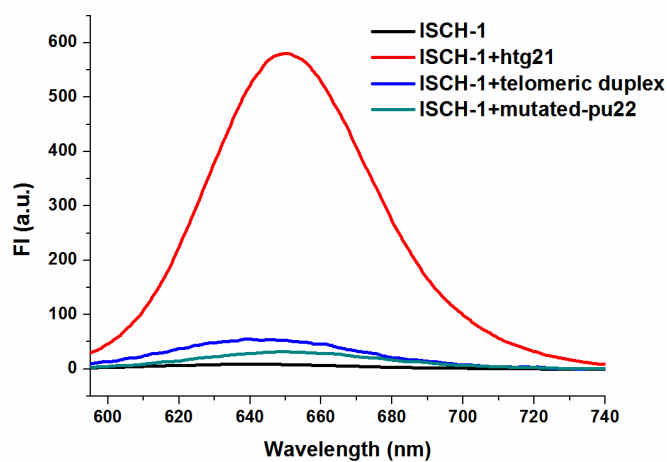

**Figure S9.** Fluorescence spectra of 5  $\mu\text{M}$  **ISCH-1** with 5  $\mu\text{M}$  different oligonucleotides (htg21, telomeric duplex and mutated-pu22) in 10 mM Tris-HCl buffer, 60 mM KCl, pH 7.4. The htg21 formed hybrid-type G-quadruplex structure. The telomeric duplex was a G-rich double-stranded DNA prepared by 1:1 mix of htg21 and htc21. The mutated-pu22 was a just G-rich single-stranded DNA that could not formed G-quadruplex structure.

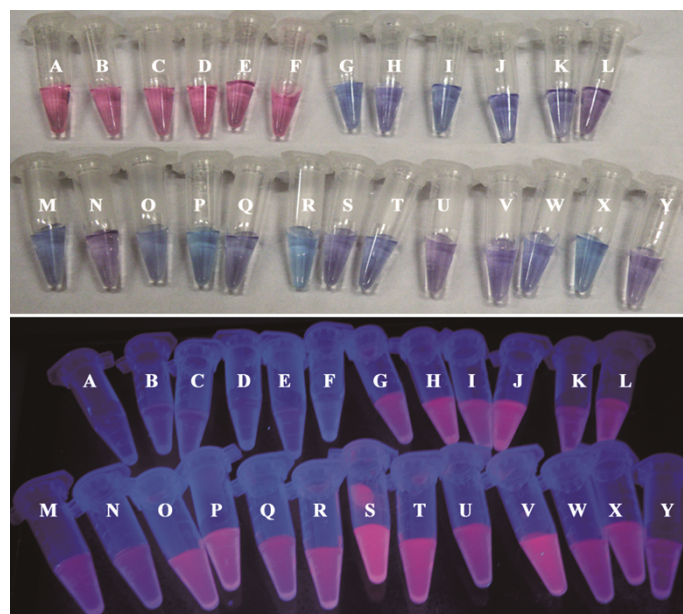

**Figure S10.** Photograph (taken under ambient light or UV light) of 5  $\mu\text{M}$  ISCH-1 without (A) and with 5  $\mu\text{M}$  dA21 (B), dT21 (C), CT-DNA (D), ds15 (E), BSA (F), c-kit1 (G), bcl-2 (H), pu27 (I), THTG (J), VEGF (K), Rb (L), c-kit2 (M), RET (N), ILPR (O), KRAS (P), STAT3 (Q), pu18 (R), htg21 (S), dimer (T), tetramer (U), HT-6 (V), rDNA-2957 (W), rDNA-5701 (X), rDNA-13079 (Y).

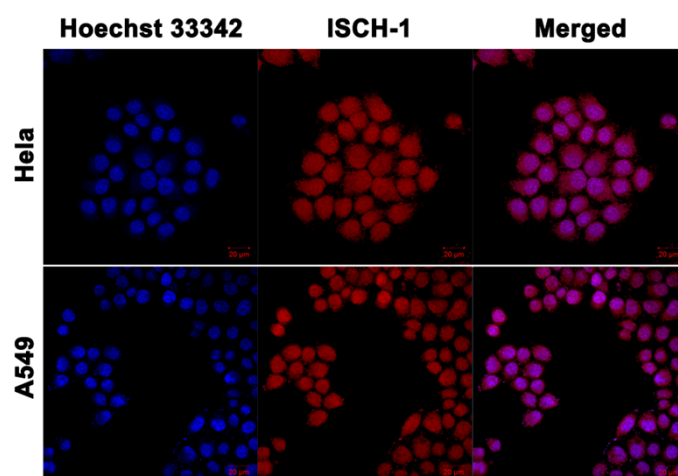

**Figure S11.** Confocal fluorescence images of live cells using a 543 nm laser. Cells were stained with 5  $\mu\text{M}$  ISCH-1 and 8  $\mu\text{M}$  ( $5 \mu\text{g}\cdot\text{mL}^{-1}$ ) Hoechst 33342.

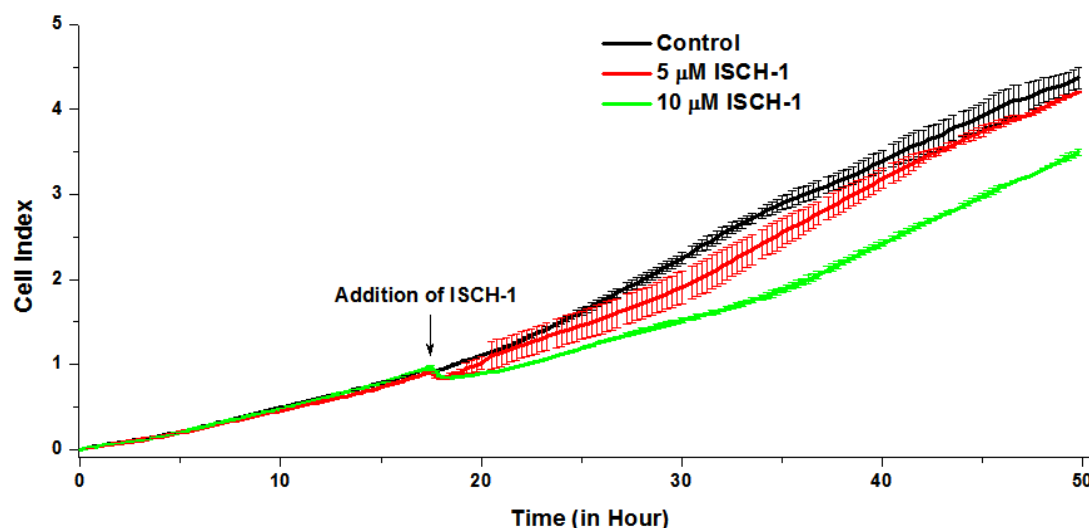

**Figure S12.** Real-time cell analysis (RTCA) of A549 cells treated with 5  $\mu\text{M}$  and 10  $\mu\text{M}$  **ISCH-1**. RTCA was performed by impedance measuring. The impedance is expressed as the cell index, which is a parameter of cell viability. In this experiment, A549 cells were seeded in 16 well E-plates. The plates were kept in the  $\text{CO}_2$  incubator (37  $^\circ\text{C}$  in 5 %  $\text{CO}_2$ ) during the experiment. After  $\sim 18$  h, 0.1% DMSO (control) or **ISCH-1** were added. Cell growth was monitored using the xCELLigence RTCA DP analyzer (Roche, Germany). The 24-hr cytotoxicity ( $\text{IC}_{50}$ ) of **ISCH-1** against A549 cells was 23.5  $\mu\text{M}$ .

## References

- 1 J.-S. Wu, W.-M. Liu, X.-Q. Zhuang, F. Wang, P.-F. Wang, S.-L. Tao, X.-H. Zhang, S.-K. Wu and S.-T. Lee, *Org. Lett.*, 2007, **9**, 33.
- 2 H. Aissaoui, M. Clozel, W. Fischli, R. Koberstein, T. Sifferlen and T. Weller, *WO Pat.*, 004733 A1, 2004.
- 3 Z.-S. Huang, L.-Q. Gu, J.-H. Tan, J.-W. Yan and W.-J. Ye, *CN Pat.*, CN102719238 A, 2012.
- 4 A. M. Brouwer, *Pure Appl. Chem.*, 2011, **83**, 2213.
- 5 R. A. Velapoldi and H. H. Tønnesen, *J. Fluoresc.*, 2004, **14**, 465.
- 6 Q. Li, Y. Kim, J. Namm, A. Kulkarni, G. R. Rosania, Y.-H. Ahn and Y.-T. Chang, *Chem. Biol.*, 2006, **13**, 615.
- 7 D. Drygin, A. Siddiqui-Jain, S. O'Brien, M. Schwaebe, A. Lin, J. Bliesath, C. B. Ho, C. Proffitt, K. Trent, J. P. Whitten, J. K. C. Lim, D. Von Hoff, K. Anderes and W. G. Rice, *Cancer Res.*, 2009, **69**, 7653.
